# Supplementary material
Source: PubMed Central journal article supplement (PMC8185954)
Supplement: NIHMS1686747-supplement-supp_tables_and_acknowledgements.pdf [file NIHMS1686747-supplement-supp_tables_and_acknowledgements.pdf]

## Supplementary Tables

Supplementary Table 1. Haplotype-based FBAT analysis of exertional dyspnoea using the genome-wide significant SNPs rs10165869, rs6725280, rs7607911, rs1865671, rs30102, and rs10168628, where A1 and A2 correspond to the haplotype with all minor and major alleles of 6 SNPs, respectively.

| Haplotype | frequency | NINFF* | S-E(S)  | Var(S)  | Z      | P value  |
|-----------|-----------|--------|---------|---------|--------|----------|
| A1        | 0.278     | 482    | 77.501  | 185.445 | 5.691  | 1.30E-08 |
| A2        | 0.651     | 520    | -77.616 | 197.655 | -5.521 | 3.38E-08 |

\*NINFF number of informative families

Supplementary Table 2. The FBAT results for the genome-wide significant SNPs in the GACRS WGS analysis of exertional dyspnoea and the replication analysis in CAMP.

|                                                                 | Chr | Position  | A1 | A2 | rsID       | frequency | NINFF* | S.E.S. | Var.S.  | Z     | p value  |
|-----------------------------------------------------------------|-----|-----------|----|----|------------|-----------|--------|--------|---------|-------|----------|
| GACRS<br>trios<br>(N=894)                                       | 2   | 236932637 | A  | G  | rs10165869 | 0.309     | 561    | 80.428 | 180.341 | 5.989 | 2.16E-09 |
|                                                                 | 2   | 236940120 | T  | C  | rs6725280  | 0.288     | 562    | 78.13  | 175.486 | 5.898 | 3.77E-09 |
|                                                                 | 2   | 236935080 | G  | A  | rs1865671  | 0.289     | 564    | 77.151 | 174.379 | 5.842 | 5.27E-09 |
|                                                                 | 2   | 236929711 | T  | C  | rs7607911  | 0.302     | 569    | 78.083 | 179.342 | 5.831 | 5.66E-09 |
|                                                                 | 2   | 236908895 | C  | G  | rs30102    | 0.304     | 584    | 76.225 | 180.017 | 5.681 | 1.37E-08 |
|                                                                 | 2   | 236933062 | A  | G  | rs10168628 | 0.336     | 606    | 76.898 | 196.043 | 5.492 | 3.97E-08 |
| CAMP<br>trios<br>(N=286,<br>dyspnea:<br>60.42%)                 | 2   | 236932637 | A  | G  | rs10165869 | 0.284     | 170    | 18.726 | 68.288  | 2.266 | 0.023445 |
|                                                                 | 2   | 236940120 | T  | C  | rs6725280  | 0.267     | 168    | 12.27  | 66.679  | 1.503 | 0.132928 |
|                                                                 | 2   | 236935080 | G  | A  | rs1865671  | 0.271     | 172    | 13.423 | 68.014  | 1.628 | 0.103599 |
|                                                                 | 2   | 236929711 | T  | C  | rs7607911  | 0.285     | 172    | 17.435 | 68.467  | 2.107 | 0.035107 |
|                                                                 | 2   | 236908895 | C  | G  | rs30102    | 0.275     | 168    | 16.441 | 67.900  | 1.995 | 0.046018 |
|                                                                 | 2   | 236933062 | A  | G  | rs10168628 | 0.338     | 197    | 16.772 | 79.905  | 1.876 | 0.060621 |
| CAMP<br>European<br>American<br>(N= 216,<br>dyspnea:<br>61.21%) | 2   | 236932637 | A  | G  | rs10165869 | 0.308     | 135    | 13.77  | 56.454  | 1.833 | 0.066847 |
|                                                                 | 2   | 236940120 | T  | C  | rs6725280  | 0.287     | 136    | 8.27   | 55.512  | 1.11  | 0.266992 |
|                                                                 | 2   | 236935080 | G  | A  | rs1865671  | 0.288     | 137    | 8.958  | 55.985  | 1.197 | 0.231227 |
|                                                                 | 2   | 236929711 | T  | C  | rs7607911  | 0.306     | 136    | 12.479 | 56.197  | 1.665 | 0.095979 |
|                                                                 | 2   | 236908895 | C  | G  | rs30102    | 0.296     | 134    | 10.408 | 55.471  | 1.397 | 0.162271 |
|                                                                 | 2   | 236933062 | A  | G  | rs10168628 | 0.346     | 149    | 14.093 | 63.622  | 1.767 | 0.07726  |
| CAMP<br>African<br>American<br>(N= 28,<br>dyspnea:<br>55.56%)   | 2   | 236932637 | A  | G  | rs10165869 | 0.116     | 11     | 0.887  | 3.375   | 0.483 | 0.629201 |
|                                                                 | 2   | 236940120 | T  | C  | rs6725280  | 0.089     | 8      | 0.531  | 2.633   | 0.328 | 0.743281 |
|                                                                 | 2   | 236935080 | G  | A  | rs1865671  | 0.107     | 10     | 0.396  | 3.135   | 0.224 | 0.822818 |
|                                                                 | 2   | 236929711 | T  | C  | rs7607911  | 0.116     | 11     | 0.887  | 3.375   | 0.483 | 0.629201 |

|           |   |           |   |   |            |       |    |        |       |        |          |
|-----------|---|-----------|---|---|------------|-------|----|--------|-------|--------|----------|
|           | 2 | 236908895 | C | G | rs30102    | 0.098 | 9  | 1.022  | 2.873 | 0.603  | 0.546546 |
|           | 2 | 236933062 | A | G | rs10168628 | 0.196 | 14 | -2.765 | 5.023 | -1.234 | 0.217362 |
|           | 2 | 236932637 | A | G | rs10165869 | 0.365 | 10 | 0.719  | 3.004 | 0.415  | 0.678384 |
| CAMP      | 2 | 236940120 | T | C | rs6725280  | 0.355 | 10 | 0.118  | 3.079 | 0.067  | 0.946339 |
| Latinx    | 2 | 236935080 | G | A | rs1865671  | 0.368 | 11 | 0.719  | 3.44  | 0.387  | 0.698392 |
| (N= 19,   | 2 | 236929711 | T | C | rs7607911  | 0.368 | 11 | 0.719  | 3.44  | 0.387  | 0.698392 |
| dyspnea:  | 2 | 236908895 | C | G | rs30102    | 0.355 | 10 | 1.141  | 3.261 | 0.632  | 0.527503 |
| 63.16%)   | 2 | 236933062 | A | G | rs10168628 | 0.421 | 13 | -1.496 | 4.047 | -0.744 | 0.4571   |
|           | 2 | 236932637 | A | G | rs10165869 | 0.228 | 14 | 3.35   | 5.455 | 1.435  | 0.151425 |
|           | 2 | 236940120 | T | C | rs6725280  | 0.228 | 14 | 3.35   | 5.455 | 1.435  | 0.151425 |
| CAMP      | 2 | 236935080 | G | A | rs1865671  | 0.228 | 14 | 3.35   | 5.455 | 1.435  | 0.151425 |
| Others    | 2 | 236929711 | T | C | rs7607911  | 0.228 | 14 | 3.35   | 5.455 | 1.435  | 0.151425 |
| (N= 23,   | 2 | 236908895 | C | G | rs30102    | 0.228 | 15 | 3.87   | 6.294 | 1.542  | 0.12297  |
| dyspnea : | 2 | 236933062 | A | G | rs10168628 | 0.370 | 21 | 6.94   | 7.213 | 2.584  | 0.009767 |
| 56.52%)   |   |           |   |   |            |       |    |        |       |        |          |

\*NINFF number of informative families

Supplementary Table 3. Significant cis-eQTLs of top SNPs for *ACKR3* (ENSG00000144476.5) in lung tissues. Data Source: GTEx Analysis Release V8 (dbGaP Accession phs000424.v8.p2)

| rsID       | A1 | T-statistic | normalized effect size | p value |
|------------|----|-------------|------------------------|---------|
| rs10165869 | G  | -2.2        | -0.097                 | 0.025   |
| rs6725280  | C  | -2.6        | -0.12                  | 0.0091  |
| rs1865671  | A  | -2.6        | -0.11                  | 0.0097  |
| rs7607911  | C  | -2.5        | -0.1                   | 0.015   |
| rs30102    | C  | 1.9         | 0.084                  | 0.052   |
| rs10168628 | G  | -2          | -0.082                 | 0.046   |

## TOPMed whole-genome sequencing data

WGS data for GACRS, CAMP, and COPDGene was generated as part of the National Heart, Lung, and Blood Institute (NHLBI) Trans-Omics for Precision Medicine (TOPMed) program<sup>1</sup>. Details on DNA sample handling, quality control, library construction, clustering and sequencing, read processing, and sequence data quality control are described on the TOPMed website (<https://www.nhlbiwgs.org/topmed-whole-genome-sequencing-methods-freeze-8>). Variant calls were obtained from TOPMed data freeze 8 variant call format files aligned to the GRCh38 genome reference. In our analyses, we included only biallelic SNPs with a minimal depth of coverage of 10 reads that were marked as PASS in the VCF FILTER column.

### Acknowledgments: TOPMed Banner Authorship

| Name                      | Institution(s)                                                  | Primary Department           | Institution City | Country |
|---------------------------|-----------------------------------------------------------------|------------------------------|------------------|---------|
| Abe, Namiko               | New York Genome Center                                          |                              | New York         | US      |
| Abecasis, Gonçalo         | University of Michigan                                          |                              | Ann Arbor        | US      |
| Aguet, Francois           | Broad Institute                                                 |                              | Cambridge        | US      |
| Albert, Christine         | Cedars Sinai                                                    |                              | Boston           | US      |
| Almasy, Laura             | Children's Hospital of Philadelphia, University of Pennsylvania |                              | Philadelphia     | US      |
| Alonso, Alvaro            | Emory University                                                |                              | Atlanta          | US      |
| Ament, Seth               | University of Maryland                                          |                              | Baltimore        | US      |
| Anderson, Peter           | University of Washington                                        |                              | Seattle          | US      |
| Anugu, Pramod             | University of Mississippi                                       |                              | Jackson          | US      |
| Applebaum-Bowden, Deborah | National Institutes of Health                                   |                              | Bethesda         | US      |
| Ardlie, Kristin           | Broad Institute                                                 |                              | Cambridge        | US      |
| Arking, Dan               | Johns Hopkins University                                        |                              | Baltimore        | US      |
| Arnett, Donna K           | University of Kentucky                                          |                              | Lexington        | US      |
| Ashley-Koch, Allison      | Duke University                                                 |                              | Durham           | US      |
| Aslibekyan, Stella        | University of Alabama                                           |                              | Birmingham       | US      |
| Assimes, Tim              | Stanford University                                             |                              | Stanford         | US      |
| Auer, Paul                | University of Wisconsin Milwaukee                               |                              | Milwaukee        | US      |
| Avramopoulos, Dimitrios   | Johns Hopkins University                                        |                              | Baltimore        | US      |
| Barnard, John             | Cleveland Clinic                                                |                              | Cleveland        | US      |
| Barnes, Kathleen          | University of Colorado Anschutz Medical Campus                  |                              | Aurora           | US      |
| Barr, R. Graham           | Columbia University                                             |                              | New York         | US      |
| Barron-Casella, Emily     | Johns Hopkins University                                        |                              | Baltimore        | US      |
| Barwick, Lucas            | The Emmes Corporation                                           | LTRC                         | Rockville        | US      |
| Beaty, Terri              | Johns Hopkins University                                        |                              | Baltimore        | US      |
| Beck, Gerald              | Cleveland Clinic                                                | Quantitative Health Sciences | Cleveland        | US      |

|                    |                                                                          |                                                                |                 |    |
|--------------------|--------------------------------------------------------------------------|----------------------------------------------------------------|-----------------|----|
| Becker, Diane      | Johns Hopkins University                                                 | Medicine                                                       | Baltimore       | US |
| Becker, Lewis      | Johns Hopkins University                                                 |                                                                | Baltimore       | US |
| Beer, Rebecca      | National Heart, Lung, and Blood Institute, National Institutes of Health |                                                                | Bethesda        | US |
| Beitelshees, Amber | University of Maryland                                                   |                                                                | Baltimore       | US |
| Benjamin, Emelia   | Boston University,<br>Massachusetts General Hospital                     | Boston University School of Medicine                           | Boston          | US |
| Benos, Takis       | University of Pittsburgh                                                 |                                                                | Pittsburgh      | US |
| Bezerra, Marcos    | Fundação de Hematologia e Hemoterapia de Pernambuco - Hemope             |                                                                | Recife          | BR |
| Bielak, Larry      | University of Michigan                                                   |                                                                | Ann Arbor       | US |
| Bis, Joshua        | University of Washington                                                 | Cardiovascular Health Research Unit,<br>Department of Medicine | Seattle         | US |
| Blackwell, Thomas  | University of Michigan                                                   |                                                                | Ann Arbor       | US |
| Blangero, John     | University of Texas Rio Grande<br>Valley School of Medicine              | Human Genetics                                                 | Brownsville     | US |
| Boerwinkle, Eric   | University of Texas Health at Houston                                    |                                                                | Houston         | US |
| Bowden, Donald W.  | Wake Forest Baptist Health                                               | Department of Biochemistry                                     | Winston-Salem   | US |
| Bowler, Russell    | National Jewish Health                                                   | National Jewish Health                                         | Denver          | US |
| Brody, Jennifer    | University of Washington                                                 |                                                                | Seattle         | US |
| Broeckel, Ulrich   | Medical College of Wisconsin                                             |                                                                | Milwaukee       | US |
| Broome, Jai        | University of Washington                                                 |                                                                | Seattle         | US |
| Bunting, Karen     | New York Genome Center                                                   |                                                                | New York        | US |
| Burchard, Esteban  | University of California, San Francisco                                  |                                                                | San Francisco   | US |
| Bustamante, Carlos | Stanford University                                                      | Biomedical Data Science                                        | Stanford        | US |
| Buth, Erin         | University of Washington                                                 | Biostatistics                                                  | Seattle         | US |
| Cade, Brian        | Brigham & Women's Hospital                                               | Brigham and Women's Hospital                                   | Boston          | US |
| Cardwell, Jonathan | University of Colorado at Denver                                         |                                                                | Denver          | US |
| Carey, Vincent     | Brigham & Women's Hospital                                               |                                                                | Boston          | US |
| Carty, Cara        | Washington State University                                              |                                                                | Pullman         | US |
| Casaburi, Richard  | University of California, Los Angeles                                    |                                                                | Los Angeles     | US |
| Casella, James     | Johns Hopkins University                                                 |                                                                | Baltimore       | US |
| Castaldi, Peter    | Brigham & Women's Hospital                                               | Medicine                                                       | Boston          | US |
| Chaffin, Mark      | Broad Institute                                                          |                                                                | Cambridge       | US |
| Chang, Christy     | University of Maryland                                                   |                                                                | Baltimore       | US |
| Chang, Yi-Cheng    | National Taiwan University                                               |                                                                | Taipei          | TW |
| Chasman, Daniel    | Brigham & Women's Hospital                                               | Division of Preventive Medicine                                | Boston          | US |
| Chavan, Sameer     | University of Colorado at Denver                                         |                                                                | Denver          | US |
| Chen, Bo-Juen      | New York Genome Center                                                   |                                                                | New York        | US |
| Chen, Wei-Min      | University of Virginia                                                   |                                                                | Charlottesville | US |
| Chen, Yii-Der Ida  | Lundquist Institute                                                      |                                                                | Torrance        | US |

|                         |                                                          |                                                    |               |    |
|-------------------------|----------------------------------------------------------|----------------------------------------------------|---------------|----|
| Cho, Michael            | Brigham & Women's Hospital                               |                                                    | Boston        | US |
| Choi, Seung<br>Hoan     | Broad Institute                                          |                                                    | Cambridge     | US |
| Chuang, Lee-<br>Ming    | National Taiwan University                               | National Taiwan University Hospital                | Taipei        | TW |
| Chung, Mina             | Cleveland Clinic                                         | Cleveland Clinic                                   | Cleveland     | US |
| Chung, Ren-Hua          | National Health Research Institute Taiwan                |                                                    | Miaoli County | TW |
| Clish, Clary            | Broad Institute                                          | Metabolomics Platform                              | Cambridge     | US |
| Comhair, Suzy           | Cleveland Clinic                                         | Immunity and Immunology                            | Cleveland     | US |
| Conomos,<br>Matthew     | University of Washington                                 | Biostatistics                                      | Seattle       | US |
| Cornell, Elaine         | University of Vermont                                    |                                                    | Burlington    | US |
| Correa, Adolfo          | University of Mississippi                                | Medicine                                           | Jackson       | US |
| Crandall, Carolyn       | University of California, Los Angeles                    |                                                    | Los Angeles   | US |
| Crapo, James            | National Jewish Health                                   |                                                    | Denver        | US |
| Cupples, L.<br>Adrienne | Boston University                                        | Biostatistics                                      | Boston        | US |
| Curran, Joanne          | University of Texas Rio Grande Valley School of Medicine |                                                    | Brownsville   | US |
| Curtis, Jeffrey         | University of Michigan                                   |                                                    | Ann Arbor     | US |
| Custer, Brian           | Vitalant Research Institute                              |                                                    | San Francisco | US |
| Damcott, Coleen         | University of Maryland                                   |                                                    | Baltimore     | US |
| Darbar, Dawood          | University of Illinois at Chicago                        |                                                    | Chicago       | US |
| Das, Sayantan           | University of Michigan                                   |                                                    | Ann Arbor     | US |
| David, Sean             | University of Chicago                                    |                                                    | Chicago       | US |
| Davis, Colleen          | University of Washington                                 |                                                    | Seattle       | US |
| Daya, Michelle          | University of Colorado at Denver                         |                                                    | Denver        | US |
| de Andrade,<br>Mariza   | Mayo Clinic                                              | Health Sciences Research                           | Rochester     | US |
| de las Fuentes,<br>Lisa | Washington University in St<br>Louis                     | Department of Medicine, Cardiovascular<br>Division | St. Louis     | US |
| DeBaun, Michael         | Vanderbilt University                                    |                                                    | Nashville     | US |
| Deka, Ranjan            | University of Cincinnati                                 |                                                    | Cincinnati    | US |
| DeMeo, Dawn             | Brigham & Women's Hospital                               |                                                    | Boston        | US |
| Devine, Scott           | University of Maryland                                   |                                                    | Baltimore     | US |
| Duan, Qing              | University of North Carolina                             |                                                    | Chapel Hill   | US |
| Duggirala, Ravi         | University of Texas Rio Grande Valley School of Medicine |                                                    | Edinburg      | US |
| Durda, Jon Peter        | University of Vermont                                    |                                                    | Burlington    | US |
| Dutcher, Susan          | Washington University in St Louis                        |                                                    | St Louis      | US |
| Eaton, Charles          | Brown University                                         |                                                    | Providence    | US |
| Ekunwe, Lynette         | University of Mississippi                                |                                                    | Jackson       | US |
| El Boueiz, Adel         | Harvard University                                       | Channing Division of Network Medicine              | Cambridge     | US |
| Ellinor, Patrick        | Massachusetts General Hospital                           |                                                    | Boston        | US |
| Emery, Leslie           | University of Washington                                 |                                                    | Seattle       | US |

|                          |                                                                          |                                          |                 |    |
|--------------------------|--------------------------------------------------------------------------|------------------------------------------|-----------------|----|
| Erzurum, Serpil          | Cleveland Clinic                                                         |                                          | Cleveland       | US |
| Farber, Charles          | University of Virginia                                                   |                                          | Charlottesville | US |
| Fingerlin, Tasha         | National Jewish Health                                                   | Center for Genes, Environment and Health | Denver          | US |
| Flickinger, Matthew      | University of Michigan                                                   |                                          | Ann Arbor       | US |
| Fornage, Myriam          | University of Texas Health at Houston                                    |                                          | Houston         | US |
| Franceschini, Nora       | University of North Carolina                                             | Epidemiology                             | Chapel Hill     | US |
| Frazar, Chris            | University of Washington                                                 |                                          | Seattle         | US |
| Fu, Mao                  | University of Maryland                                                   |                                          | Baltimore       | US |
| Fullerton, Stephanie M.  | University of Washington                                                 |                                          | Seattle         | US |
| Fulton, Lucinda          | Washington University in St Louis                                        |                                          | St Louis        | US |
| Gabriel, Stacey          | Broad Institute                                                          |                                          | Cambridge       | US |
| Gan, Weiniu              | National Heart, Lung, and Blood Institute, National Institutes of Health |                                          | Bethesda        | US |
| Gao, Shanshan            | University of Colorado at Denver                                         |                                          | Denver          | US |
| Gao, Yan                 | University of Mississippi                                                |                                          | Jackson         | US |
| Gass, Margery            | Fred Hutchinson Cancer Research Center                                   |                                          | Seattle         | US |
| Gelb, Bruce              | Icahn School of Medicine at Mount Sinai                                  |                                          | New York        | US |
| Geng, Xiaoqi (Priscilla) | University of Michigan                                                   |                                          | Ann Arbor       | US |
| Geraci, Mark             | Indiana University                                                       | Medicine                                 | Indianapolis    | US |
| Germer, Soren            | New York Genome Center                                                   |                                          | New York        | US |
| Gerszten, Robert         | Beth Israel Deaconess Medical Center                                     |                                          | Boston          | US |
| Ghosh, Auyon             | Brigham & Women's Hospital                                               |                                          | Boston          | US |
| Gibbs, Richard           | Baylor College of Medicine Human Genome Sequencing Center                |                                          | Houston         | US |
| Gignoux, Chris           | Stanford University                                                      |                                          | Stanford        | US |
| Gladwin, Mark            | University of Pittsburgh                                                 |                                          | Pittsburgh      | US |
| Glahn, David             | Yale University                                                          |                                          | New Haven       | US |
| Gogarten, Stephanie      | University of Washington                                                 |                                          | Seattle         | US |
| Gong, Da-Wei             | University of Maryland                                                   |                                          | Baltimore       | US |
| Goring, Harald           | University of Texas Rio Grande Valley School of Medicine                 |                                          | San Antonio     | US |
| Graw, Sharon             | University of Colorado Anschutz Medical Campus                           |                                          | Aurora          | US |
| Grine, Daniel            | University of Colorado at Denver                                         |                                          | Denver          | US |
| Gu, C. Charles           | Washington University in St Louis                                        |                                          | St Louis        | US |
| Guan, Yue                | University of Maryland                                                   |                                          | Baltimore       | US |
| Guo, Xiuqing             | Lundquist Institute                                                      |                                          | Torrance        | US |
| Gupta, Namrata           | Broad Institute                                                          |                                          | Cambridge       | US |
| Haessler, Jeff           | Fred Hutchinson Cancer Research Center                                   |                                          | Seattle         | US |
| Hall, Michael            | University of Mississippi                                                |                                          | Jackson         | US |
| Harris, Daniel           | University of Maryland                                                   |                                          | Baltimore       | US |

|                        |                                                                          |                                                                       |               |    |
|------------------------|--------------------------------------------------------------------------|-----------------------------------------------------------------------|---------------|----|
| Hawley, Nicola L.      | Yale University                                                          | Department of Chronic Disease Epidemiology                            | New Haven     | US |
| He, Jiang              | Tulane University                                                        |                                                                       | New Orleans   | US |
| Heavner, Ben           | University of Washington                                                 | Biostatistics                                                         | Seattle       | US |
| Heckbert, Susan        | University of Washington                                                 |                                                                       | Seattle       | US |
| Hernandez, Ryan        | University of California, San Francisco                                  |                                                                       | San Francisco | US |
| Herrington, David      | Wake Forest Baptist Health                                               |                                                                       | Winston-Salem | US |
| Hersh, Craig           | Brigham & Women's Hospital                                               | Channing Division of Network Medicine                                 | Boston        | US |
| Hidalgo, Bertha        | University of Alabama                                                    |                                                                       | Birmingham    | US |
| Hixson, James          | University of Texas Health at Houston                                    |                                                                       | Houston       | US |
| Hobbs, Brian           | Brigham & Women's Hospital                                               |                                                                       | Boston        | US |
| Hokanson, John         | University of Colorado at Denver                                         |                                                                       | Denver        | US |
| Hong, Elliott          | University of Maryland                                                   |                                                                       | Baltimore     | US |
| Hoth, Karin            | University of Iowa                                                       |                                                                       | Iowa City     | US |
| Hsiung, Chao (Agnes)   | National Health Research Institute Taiwan                                | Institute of Population Health Sciences, NHRI                         | Miaoli County | TW |
| Hung, Yi-Jen           | Tri-Service General Hospital                                             | National Defense Medical Center                                       |               | TW |
| Huston, Haley          | Blood Works Northwest                                                    |                                                                       | Seattle       | US |
| Hwu, Chii Min          | Taichung Veterans General Hospital                                       |                                                                       | Taichung City | TW |
| Irvin, Marguerite Ryan | University of Alabama                                                    |                                                                       | Birmingham    | US |
| Jackson, Rebecca       | Ohio State University Wexner Medical Center                              | Internal Medicine, Division of Endocrinology, Diabetes and Metabolism | Columbus      | US |
| Jain, Deepti           | University of Washington                                                 |                                                                       | Seattle       | US |
| Jaquish, Cashell       | National Heart, Lung, and Blood Institute, National Institutes of Health |                                                                       | Bethesda      | US |
| Jhun, Min A            | University of Michigan                                                   |                                                                       | Ann Arbor     | US |
| Johnsen, Jill          | Blood Works Northwest                                                    |                                                                       | Seattle       | US |
| Johnson, Andrew        | National Heart, Lung, and Blood Institute, National Institutes of Health |                                                                       | Bethesda      | US |
| Johnson, Craig         | University of Washington                                                 |                                                                       | Seattle       | US |
| Johnston, Rich         | Emory University                                                         |                                                                       | Atlanta       | US |
| Jones, Kimberly        | Johns Hopkins University                                                 |                                                                       | Baltimore     | US |
| Kang, Hyun Min         | University of Michigan                                                   | Biostatistics                                                         | Ann Arbor     | US |
| Kaplan, Robert         | Albert Einstein College of Medicine                                      |                                                                       | New York      | US |
| Kardia, Sharon         | University of Michigan                                                   |                                                                       | Ann Arbor     | US |
| Kathiresan, Sekar      | Broad Institute                                                          |                                                                       | Cambridge     | US |
| Kelly, Shannon         | Vitalant Research Institute                                              |                                                                       | San Francisco | US |
| Kenny, Eimear          | Icahn School of Medicine at Mount Sinai                                  |                                                                       | New York      | US |
| Kessler, Michael       | University of Maryland                                                   |                                                                       | Baltimore     | US |
| Khan, Alyna            | University of Washington                                                 |                                                                       | Seattle       | US |
| Kim, Wonji             | Harvard University                                                       |                                                                       | Cambridge     | US |
| Kinney, Greg           | University of Colorado at Denver                                         |                                                                       | Denver        | US |
| Konkle, Barbara        | Blood Works Northwest                                                    |                                                                       | Seattle       | US |

|                      |                                                                          |                                                          |                 |    |
|----------------------|--------------------------------------------------------------------------|----------------------------------------------------------|-----------------|----|
| Kooperberg, Charles  | Fred Hutchinson Cancer Research Center                                   |                                                          | Seattle         | US |
| Kramer, Holly        | Loyola University                                                        | Public Health Sciences                                   | Maywood         | US |
| Lange, Christoph     | Harvard School of Public Health                                          | Biostats                                                 | Boston          | US |
| Lange, Ethan         | University of Colorado at Denver                                         |                                                          | Denver          | US |
| Lange, Leslie        | University of Colorado at Denver                                         |                                                          | Denver          | US |
| Laurie, Cathy        | University of Washington                                                 |                                                          | Seattle         | US |
| Laurie, Cecelia      | University of Washington                                                 |                                                          | Seattle         | US |
| LeBoff, Meryl        | Brigham & Women's Hospital                                               |                                                          | Boston          | US |
| Lee, Jiwon           | Brigham & Women's Hospital                                               |                                                          | Boston          | US |
| Lee, Seunggeun Shawn | University of Michigan                                                   |                                                          | Ann Arbor       | US |
| Lee, Wen-Jane        | Taichung Veterans General Hospital Taiwan                                |                                                          | Taichung City   | TW |
| LeFaive, Jonathon    | University of Michigan                                                   |                                                          | Ann Arbor       | US |
| Levine, David        | University of Washington                                                 |                                                          | Seattle         | US |
| Levy, Dan            | National Heart, Lung, and Blood Institute, National Institutes of Health |                                                          | Bethesda        | US |
| Lewis, Joshua        | University of Maryland                                                   |                                                          | Baltimore       | US |
| Li, Xiaohui          | Lundquist Institute                                                      |                                                          | Torrance        | US |
| Li, Yun              | University of North Carolina                                             |                                                          | Chapel Hill     | US |
| Lin, Henry           | Lundquist Institute                                                      |                                                          | Torrance        | US |
| Lin, Honghuang       | Boston University                                                        |                                                          | Boston          | US |
| Lin, Keng Han        | University of Michigan                                                   |                                                          | Ann Arbor       | US |
| Lin, Xihong          | Harvard School of Public Health                                          |                                                          | Boston          | US |
| Liu, Simin           | Brown University                                                         | Epidemiology and Medicine                                | Providence      | US |
| Liu, Yongmei         | Duke University                                                          | Cardiology                                               | Durham          | US |
| Liu, Yu              | Stanford University                                                      | Cardiovascular Institute                                 | Stanford        | US |
| Loos, Ruth J.F.      | Icahn School of Medicine at Mount Sinai                                  | The Charles Bronfman Institute for Personalized Medicine | New York        | US |
| Lubitz, Steven       | Massachusetts General Hospital                                           |                                                          | Boston          | US |
| Lunetta, Kathryn     | Boston University                                                        |                                                          | Boston          | US |
| Luo, James           | National Heart, Lung, and Blood Institute, National Institutes of Health |                                                          | Bethesda        | US |
| Mahaney, Michael     | University of Texas Rio Grande Valley School of Medicine                 |                                                          | Brownsville     | US |
| Make, Barry          | Johns Hopkins University                                                 |                                                          | Baltimore       | US |
| Manichaikul, Ani     | University of Virginia                                                   |                                                          | Charlottesville | US |
| Manson, JoAnn        | Brigham & Women's Hospital                                               |                                                          | Boston          | US |
| Margolin, Lauren     | Broad Institute                                                          |                                                          | Cambridge       | US |
| Martin, Lisa         | George Washington University                                             |                                                          | Washington      | US |
| Mathai, Susan        | University of Colorado at Denver                                         |                                                          | Denver          | US |
| Mathias, Rasika      | Johns Hopkins University                                                 |                                                          | Baltimore       | US |
| May, Susanne         | University of Washington                                                 | Biostatistics                                            | Seattle         | US |
| McArdle, Patrick     | University of Maryland                                                   |                                                          | Baltimore       | US |



|                      |                                                                          |                                   |                 |    |
|----------------------|--------------------------------------------------------------------------|-----------------------------------|-----------------|----|
| McDonald, Merry-Lynn | University of Alabama                                                    |                                   | Birmingham      | US |
| McFarland, Sean      | Harvard University                                                       |                                   | Cambridge       | US |
| McGarvey, Stephen    | Brown University                                                         |                                   | Providence      | US |
| McGoldrick, Daniel   | University of Washington                                                 |                                   | Seattle         | US |
| McHugh, Caitlin      | University of Washington                                                 | Biostatistics                     | Seattle         | US |
| Mei, Hao             | University of Mississippi                                                |                                   | Jackson         | US |
| Mestroni, Luisa      | University of Colorado Anschutz Medical Campus                           |                                   | Aurora          | US |
| Meyers, Deborah A    | University of Arizona                                                    |                                   | Tucson          | US |
| Mikulla, Julie       | National Heart, Lung, and Blood Institute, National Institutes of Health |                                   | Bethesda        | US |
| Min, Nancy           | University of Mississippi                                                |                                   | Jackson         | US |
| Minear, Mollie       | National Heart, Lung, and Blood Institute, National Institutes of Health |                                   | Bethesda        | US |
| Minster, Ryan L      | University of Pittsburgh                                                 |                                   | Pittsburgh      | US |
| Mitchell, Braxton D. | University of Maryland                                                   |                                   | Baltimore       | US |
| Moll, Matt           | Brigham & Women's Hospital                                               | Medicine                          | Boston          | US |
| Montasser, May E.    | University of Maryland                                                   |                                   | Baltimore       | US |
| Montgomery, Courtney | Oklahoma Medical Research Foundation                                     | Genes and Human Disease           | Oklahoma City   | US |
| Moscatti, Arden      | Icahn School of Medicine at Mount Sinai                                  |                                   | New York        | US |
| Musani, Solomon      | University of Mississippi                                                | Medicine                          | Jackson         | US |
| Mwasongwe, Stanford  | University of Mississippi                                                |                                   | Jackson         | US |
| Mychaleckyj, Josyf C | University of Virginia                                                   |                                   | Charlottesville | US |
| Nadkarni, Girish     | Icahn School of Medicine at Mount Sinai                                  |                                   | New York        | US |
| Naik, Rakhi          | Johns Hopkins University                                                 |                                   | Baltimore       | US |
| Naseri, Take         | Ministry of Health, Government of Samoa                                  |                                   | Apia            | WS |
| Natarajan, Pradeep   | Broad Institute                                                          |                                   | Cambridge       | US |
| Nekhai, Sergei       | Howard University                                                        |                                   | Washington      | US |
| Nelson, Sarah C.     | University of Washington                                                 | Biostatistics                     | Seattle         | US |
| Neltner, Bonnie      | University of Colorado at Denver                                         |                                   | Denver          | US |
| Nickerson, Deborah   | University of Washington                                                 |                                   | Seattle         | US |
| North, Kari          | University of North Carolina                                             |                                   | Chapel Hill     | US |
| O'Connell, Jeff      | University of Maryland                                                   |                                   | Baltimore       | US |
| O'Connor, Tim        | University of Maryland                                                   |                                   | Baltimore       | US |
| Ochs-Balcom, Heather | University at Buffalo                                                    |                                   | Buffalo         | US |
| Paik, David T.       | Stanford University                                                      | Stanford Cardiovascular Institute | Stanford        | US |
| Palmer, Nicholette   | Wake Forest Baptist Health                                               | Biochemistry                      | Winston-Salem   | US |
| Pankow, James        | University of Minnesota                                                  |                                   | Minneapolis     | US |

|                              |                                                                          |                                                |                 |    |
|------------------------------|--------------------------------------------------------------------------|------------------------------------------------|-----------------|----|
| Papanicolaou, George         | National Heart, Lung, and Blood Institute, National Institutes of Health |                                                | Bethesda        | US |
| Parsa, Afshin                | University of Maryland                                                   |                                                | Baltimore       | US |
| Peralta, Juan Manuel         | University of Texas Rio Grande Valley School of Medicine                 |                                                | Edinburg        | US |
| Perez, Marco                 | Stanford University                                                      |                                                | Stanford        | US |
| Perry, James                 | University of Maryland                                                   |                                                | Baltimore       | US |
| Peters, Ulrike               | Fred Hutchinson Cancer Research Center                                   |                                                | Seattle         | US |
| Peysner, Patricia            | University of Michigan                                                   |                                                | Ann Arbor       | US |
| Phillips, Lawrence S         | Emory University                                                         |                                                | Atlanta         | US |
| Pollin, Toni                 | University of Maryland                                                   |                                                | Baltimore       | US |
| Post, Wendy                  | Johns Hopkins University                                                 | Cardiology/Medicine                            | Baltimore       | US |
| Powers Becker, Julia         | University of Colorado at Denver                                         | Medicine                                       | Denver          | US |
| Preethi Boorgula, Meher      | University of Colorado at Denver                                         |                                                | Denver          | US |
| Preuss, Michael              | Icahn School of Medicine at Mount Sinai                                  |                                                | New York        | US |
| Psaty, Bruce                 | University of Washington                                                 |                                                | Seattle         | US |
| Qasba, Pankaj                | National Heart, Lung, and Blood Institute, National Institutes of Health |                                                | Bethesda        | US |
| Qiao, Dandi                  | Brigham & Women's Hospital                                               |                                                | Boston          | US |
| Qin, Zhaohui                 | Emory University                                                         |                                                | Atlanta         | US |
| Rafaels, Nicholas            | University of Colorado at Denver                                         |                                                | Denver          | US |
| Raffield, Laura              | University of North Carolina                                             | Genetics                                       | Chapel Hill     | US |
| Ramachandran, Vasan S.       | Boston University                                                        |                                                | Boston          | US |
| Rao, D.C.                    | Washington University in St Louis                                        |                                                | St Louis        | US |
| Rasmussen-Torvik, Laura      | Northwestern University                                                  |                                                | Chicago         | US |
| Ratan, Aakrosh               | University of Virginia                                                   |                                                | Charlottesville | US |
| Redline, Susan               | Brigham & Women's Hospital                                               |                                                | Boston          | US |
| Reed, Robert                 | University of Maryland                                                   |                                                | Baltimore       | US |
| Regan, Elizabeth             | National Jewish Health                                                   |                                                | Denver          | US |
| Reiner, Alex                 | Fred Hutchinson Cancer Research Center, University of Washington         |                                                | Seattle         | US |
| Reupena, Muagututi'a Sefuiva | Lutia I Puava Ae Mapu I Fagalele                                         |                                                | Apia            | WS |
| Rice, Ken                    | University of Washington                                                 |                                                | Seattle         | US |
| Rich, Stephen                | University of Virginia                                                   |                                                | Charlottesville | US |
| Roden, Dan                   | Vanderbilt University                                                    | Medicine, Pharmacology, Biomedical Informatics | Nashville       | US |
| Roselli, Carolina            | Broad Institute                                                          |                                                | Cambridge       | US |
| Rotter, Jerome               | Lundquist Institute                                                      |                                                | Torrance        | US |
| Ruczinski, Ingo              | Johns Hopkins University                                                 |                                                | Baltimore       | US |
| Russell, Pamela              | University of Colorado at Denver                                         |                                                | Denver          | US |
| Ruuska, Sarah                | Blood Works Northwest                                                    |                                                | Seattle         | US |

|                           |                                           |                                 |               |    |
|---------------------------|-------------------------------------------|---------------------------------|---------------|----|
| Ryan, Kathleen            | University of Maryland                    |                                 | Baltimore     | US |
| Sabino, Ester<br>Cerdeira | Universidade de Sao Paulo                 | Faculdade de Medicina           | Sao Paulo     | BR |
| Saleheen, Danish          | Columbia University                       |                                 | New York      | US |
| Salimi, Shabnam           | University of Maryland                    |                                 | Baltimore     | US |
| Salzberg, Steven          | Johns Hopkins University                  |                                 | Baltimore     | US |
| Sandow, Kevin             | Lundquist Institute                       | TGPS                            | Torrance      | US |
| Sankaran, Vijay<br>G.     | Harvard University                        | Division of Hematology/Oncology | Cambridge     | US |
| Scheller,<br>Christopher  | University of Michigan                    |                                 | Ann Arbor     | US |
| Schmidt, Ellen            | University of Michigan                    |                                 | Ann Arbor     | US |
| Schwander,<br>Karen       | Washington University in St Louis         |                                 | St Louis      | US |
| Schwartz, David           | University of Colorado at Denver          |                                 | Denver        | US |
| Sciurba, Frank            | University of Pittsburgh                  |                                 | Pittsburgh    | US |
| Seidman,<br>Christine     | Harvard Medical School                    | Genetics                        | Boston        | US |
| Seidman,<br>Jonathan      | Harvard Medical School                    |                                 | Boston        | US |
| Sheehan, Vivien           | Baylor College of Medicine                | Pediatrics                      | Houston       | US |
| Sherman,<br>Stephanie L.  | Emory University                          | Human Genetics                  | Atlanta       | US |
| Shetty, Amol              | University of Maryland                    |                                 | Baltimore     | US |
| Shetty, Aniket            | University of Colorado at Denver          |                                 | Denver        | US |
| Sheu, Wayne<br>Hui-Heng   | Taichung Veterans General Hospital Taiwan |                                 | Taichung City | TW |
| Shoemaker, M.<br>Benjamin | Vanderbilt University                     | Medicine/Cardiology             | Nashville     | US |
| Silver, Brian             | UMass Memorial Medical Center             |                                 | Worcester     | US |
| Silverman, Edwin          | Brigham & Women's Hospital                |                                 | Boston        | US |
| Smith, Jennifer           | University of Michigan                    |                                 | Ann Arbor     | US |
| Smith, Josh               | University of Washington                  |                                 | Seattle       | US |
| Smith, Nicholas           | University of Washington                  | Epidemiology                    | Seattle       | US |
| Smith, Tanja              | New York Genome Center                    |                                 | New York      | US |
| Smoller, Sylvia           | Albert Einstein College of Medicine       |                                 | New York      | US |
| Snively, Beverly          | Wake Forest Baptist Health                | Biostatistical Sciences         | Winston-Salem | US |
| Snyder, Michael           | Stanford University                       |                                 | Stanford      | US |
| Sofer, Tamar              | Brigham & Women's Hospital                |                                 | Boston        | US |
| Sotoodehnia,<br>Nona      | University of Washington                  |                                 | Seattle       | US |
| Stilp, Adrienne<br>M.     | University of Washington                  |                                 | Seattle       | US |
| Storm, Garrett            | University of Colorado at Denver          |                                 | Denver        | US |
| Streeten,<br>Elizabeth    | University of Maryland                    |                                 | Baltimore     | US |
| Su, Jessica Lasky         | Brigham & Women's Hospital                |                                 | Boston        | US |
| Sung, Yun Ju              | Washington University in St Louis         |                                 | St Louis      | US |

|                      |                                                |                                                               |                                   |    |
|----------------------|------------------------------------------------|---------------------------------------------------------------|-----------------------------------|----|
| Sylvia, Jody         | Brigham & Women's Hospital                     |                                                               | Boston                            | US |
| Szpiro, Adam         | University of Washington                       |                                                               | Seattle                           | US |
| Sztalryd, Carole     | University of Maryland                         |                                                               | Baltimore                         | US |
| Taliun, Daniel       | University of Michigan                         |                                                               | Ann Arbor                         | US |
| Tang, Hua            | Stanford University                            | Genetics                                                      | Stanford                          | US |
| Taub, Margaret       | Johns Hopkins University                       |                                                               | Baltimore                         | US |
| Taylor, Kent D.      | Lundquist Institute                            | Institute for Translational Genomics and Populations Sciences | Torrance                          | US |
| Taylor, Matthew      | University of Colorado Anschutz Medical Campus |                                                               | Aurora                            | US |
| Taylor, Simeon       | University of Maryland                         |                                                               | Baltimore                         | US |
| Telen, Marilyn       | Duke University                                |                                                               | Durham                            | US |
| Thornton, Timothy A. | University of Washington                       |                                                               | Seattle                           | US |
| Threlkeld, Machiko   | University of Washington                       | University of Washington, Department of Genome Sciences       | Seattle                           | US |
| Tinker, Lesley       | Fred Hutchinson Cancer Research Center         |                                                               | Seattle                           | US |
| Tirschwell, David    | University of Washington                       |                                                               | Seattle                           | US |
| Tishkoff, Sarah      | University of Pennsylvania                     | Genetics                                                      | Philadelphia                      | US |
| Tiwari, Hemant       | University of Alabama                          | Biostatistics                                                 | Birmingham                        | US |
| Tong, Catherine      | University of Washington                       | Department of Biostatistics                                   | Seattle                           | US |
| Tracy, Russell       | University of Vermont                          | Pathology & Laboratory Medicine                               | Burlington                        | US |
| Tsai, Michael        | University of Minnesota                        |                                                               | Minneapolis                       | US |
| Vaidya, Dhananjay    | Johns Hopkins University                       |                                                               | Baltimore                         | US |
| Van Den Berg, David  | University of Southern California              | USC Methylation Characterization Center                       | University of Southern California | US |
| VandeHaar, Peter     | University of Michigan                         |                                                               | Ann Arbor                         | US |
| Vrieze, Scott        | University of Minnesota                        |                                                               | Minneapolis                       | US |
| Walker, Tarik        | University of Colorado at Denver               |                                                               | Denver                            | US |
| Wallace, Robert      | University of Iowa                             |                                                               | Iowa City                         | US |
| Walts, Avram         | University of Colorado at Denver               |                                                               | Denver                            | US |
| Wang, Fei Fei        | University of Washington                       |                                                               | Seattle                           | US |
| Wang, Heming         | Brigham & Women's Hospital, Partners.org       |                                                               | Boston                            | US |
| Watson, Karol        | University of California, Los Angeles          |                                                               | Los Angeles                       | US |
| Weeks, Daniel E.     | University of Pittsburgh                       |                                                               | Pittsburgh                        | US |
| Weir, Bruce          | University of Washington                       |                                                               | Seattle                           | US |
| Weiss, Scott         | Brigham & Women's Hospital                     |                                                               | Boston                            | US |
| Weng, Lu-Chen        | Massachusetts General Hospital                 |                                                               | Boston                            | US |
| Wessel, Jennifer     | Indiana University                             | Epidemiology                                                  | Indianapolis                      | US |
| Willer, Cristen      | University of Michigan                         | Internal Medicine                                             | Ann Arbor                         | US |
| Williams, Kayleen    | University of Washington                       | Biostatistics                                                 | Seattle                           | US |

|                     |                                       |                                                           |            |    |
|---------------------|---------------------------------------|-----------------------------------------------------------|------------|----|
| Williams, L. Keoki  | Henry Ford Health System              |                                                           | Detroit    | US |
| Wilson, Carla       | Brigham & Women's Hospital            |                                                           | Boston     | US |
| Wilson, James       | Beth Israel Deaconess Medical Center  | Cardiology                                                | Cambridge  | US |
| Wong, Quenna        | University of Washington              |                                                           | Seattle    | US |
| Wu, Joseph          | Stanford University                   | Stanford Cardiovascular Institute                         | Stanford   | US |
| Xu, Huichun         | University of Maryland                |                                                           | Baltimore  | US |
| Yanek, Lisa         | Johns Hopkins University              |                                                           | Baltimore  | US |
| Yang, Ivana         | University of Colorado at Denver      |                                                           | Denver     | US |
| Yang, Rongze        | University of Maryland                |                                                           | Baltimore  | US |
| Zaghloul, Norann    | University of Maryland                |                                                           | Baltimore  | US |
| Zekavat, Maryam     | Broad Institute                       |                                                           | Cambridge  | US |
| Zhang, Yingze       | University of Pittsburgh              | Medicine                                                  | Pittsburgh | US |
| Zhao, Snow Xueyan   | National Jewish Health                |                                                           | Denver     | US |
| Zhao, Wei           | University of Michigan                | Department of Epidemiology                                | Ann Arbor  | US |
| Zhi, Degui          | University of Texas Health at Houston |                                                           | Houston    | US |
| Zhou, Xiang         | University of Michigan                |                                                           | Ann Arbor  | US |
| Zhu, Xiaofeng       | Case Western Reserve University       | Department of Population and Quantitative Health Sciences | Cleveland  | US |
| Zody, Michael       | New York Genome Center                |                                                           | New York   | US |
| Zoellner, Sebastian | University of Michigan                |                                                           | Ann Arbor  | US |

## **Acknowledgments: COPDGene investigators**

### **Administrative Center**

James D. Crapo, MD; Edwin K. Silverman, MD, PhD; Barry J. Make, MD; Elizabeth A. Regan, MD, PhD; Sara Cummings; Gisselle Gonzalez; Kelley Madden; Emily Port; Joshua Ryon; Lori Stepp; Shandi Watts, Michael Weaver

### **Executive Committee**

Terri Beaty, PhD; Russell P. Bowler, MD, PhD; James D. Crapo, MD; Jeffrey L. Curtis, MD; MeiLan K. Han, MD, MS; John E. Hokanson, MPH, PhD; David Lynch, MB; Barry J. Make, MD; Elizabeth A. Regan, MD, PhD; Edwin K. Silverman, MD, PhD; Matthew J. Strand, PhD

### **External Advisory Committee**

Gary P. Anderson, PhD; Eugene R. Bleecker, MD; Harvey O. Coxson, PhD; Ronald G. Crystal, MD; James C. Hogg, MD; Michael A. Province, PhD; Stephen I. Rennard, MD

### **NHLBI**

Thomas Croxton, MD, PhD; Weiniu Gan, PhD; Lisa Postow, PhD; Lisa M. Viviano, BSN

### **COPD Foundation**

Corinne Costa-Davis; Elisha Malanga; Delia Prieto; Ruth Tal-Singer, PhD

### **Biorepository Visit 1 (Baltimore)**

Homayoon Farzadegan, PhD; Akila Hadji

### **Biorepository Visits 2 and 3 (Boston)**

Bethany Beaulieu, Daniel Cossette, Leanna Farnam

### **Data Coordinating Center**

Grace Chen; James Crooks, PhD; Ruthie Knowles, MSW; Katherine Pratte, PhD; Matthew J. Strand, PhD; Carla Wilson, MS; Pearlanne T. Zelarney, MS

### **Epidemiology Center**

John E. Hokanson, MPH, PhD; Erin E. Austin, PhD; Gregory Kinney, MPH, PhD; Sharon Lutz, MPH, PhD; Margaret F. Ragland, MD, MS; Nicole Richmond, MPH; Kendra A. Young, MSPH, PhD

### **Genetic Analysis Center**

Terri Beaty, PhD; Christopher J. Benway, PhD; Jacqueline Bidinger, MS; Peter J. Castaldi, MD, MSc; Michael Cho, MD; Douglas Conrad, MD; Dawn L. DeMeo, MD, MPH; Adel R. El-Bouiez, MD; Marilyn G. Foreman, MD, MS; Eiten Halper-Stromberg; Nadia N. Hansel, MD, MPH; Lystra P. Hayden, MD; Craig Hersh, MD, MPH; Brian D. Hobbs, MD; Wonji Kim, MA; Woori Kim, MPH; Nan Laird, PhD; Christoph Lange, PhD; Sharon M. Lutz, MPH, PhD; Merry-Lynn McDonald, MSc, PhD; Nikolaos A. Patsopoulos, MD, PhD; Dandi Qiao; Elizabeth A. Regan, MD, PhD; Stephanie Santorico, PhD; Edwin K. Silverman, MD, PhD; Emily S. Wan, MD

### **Genotyping Centers**

Genome-Wide Center: Terri Beaty, PhD

Candidate Genotyping Center: Craig P. Hersh, MD, MPH; Edwin K. Silverman, MD, PhD

### **Imaging Center**

Harvey O. Coxson, PhD; Jennifer G. Dy, PhD; Sean B. Fain, PhD; Shoshana Ginsburg, MS; Eric A. Hoffman, PhD; Stephen Humphries, PhD; Philip F. Judy, PhD; Alex Kluiber; David Lynch MD; Joseph M. Reinhardt, PhD; James Ross, PhD; Raul San Jose Estepar, PhD; Joyce D. Schroeder,

MD; Arkadiusz Sitek, PhD; Edwin van Beek, MD, PhD, MEd; Bram van Ginneken, Eva van Rikxoort, George R. Washko, MD

**PFT QA Center**

Robert Jensen, PhD

A full listing of COPDGene investigators can also be found at:  
<http://www.copdgene.org/directory>
